# Supplementary material
Source: PubMed Central journal article supplement (PMC3341628)

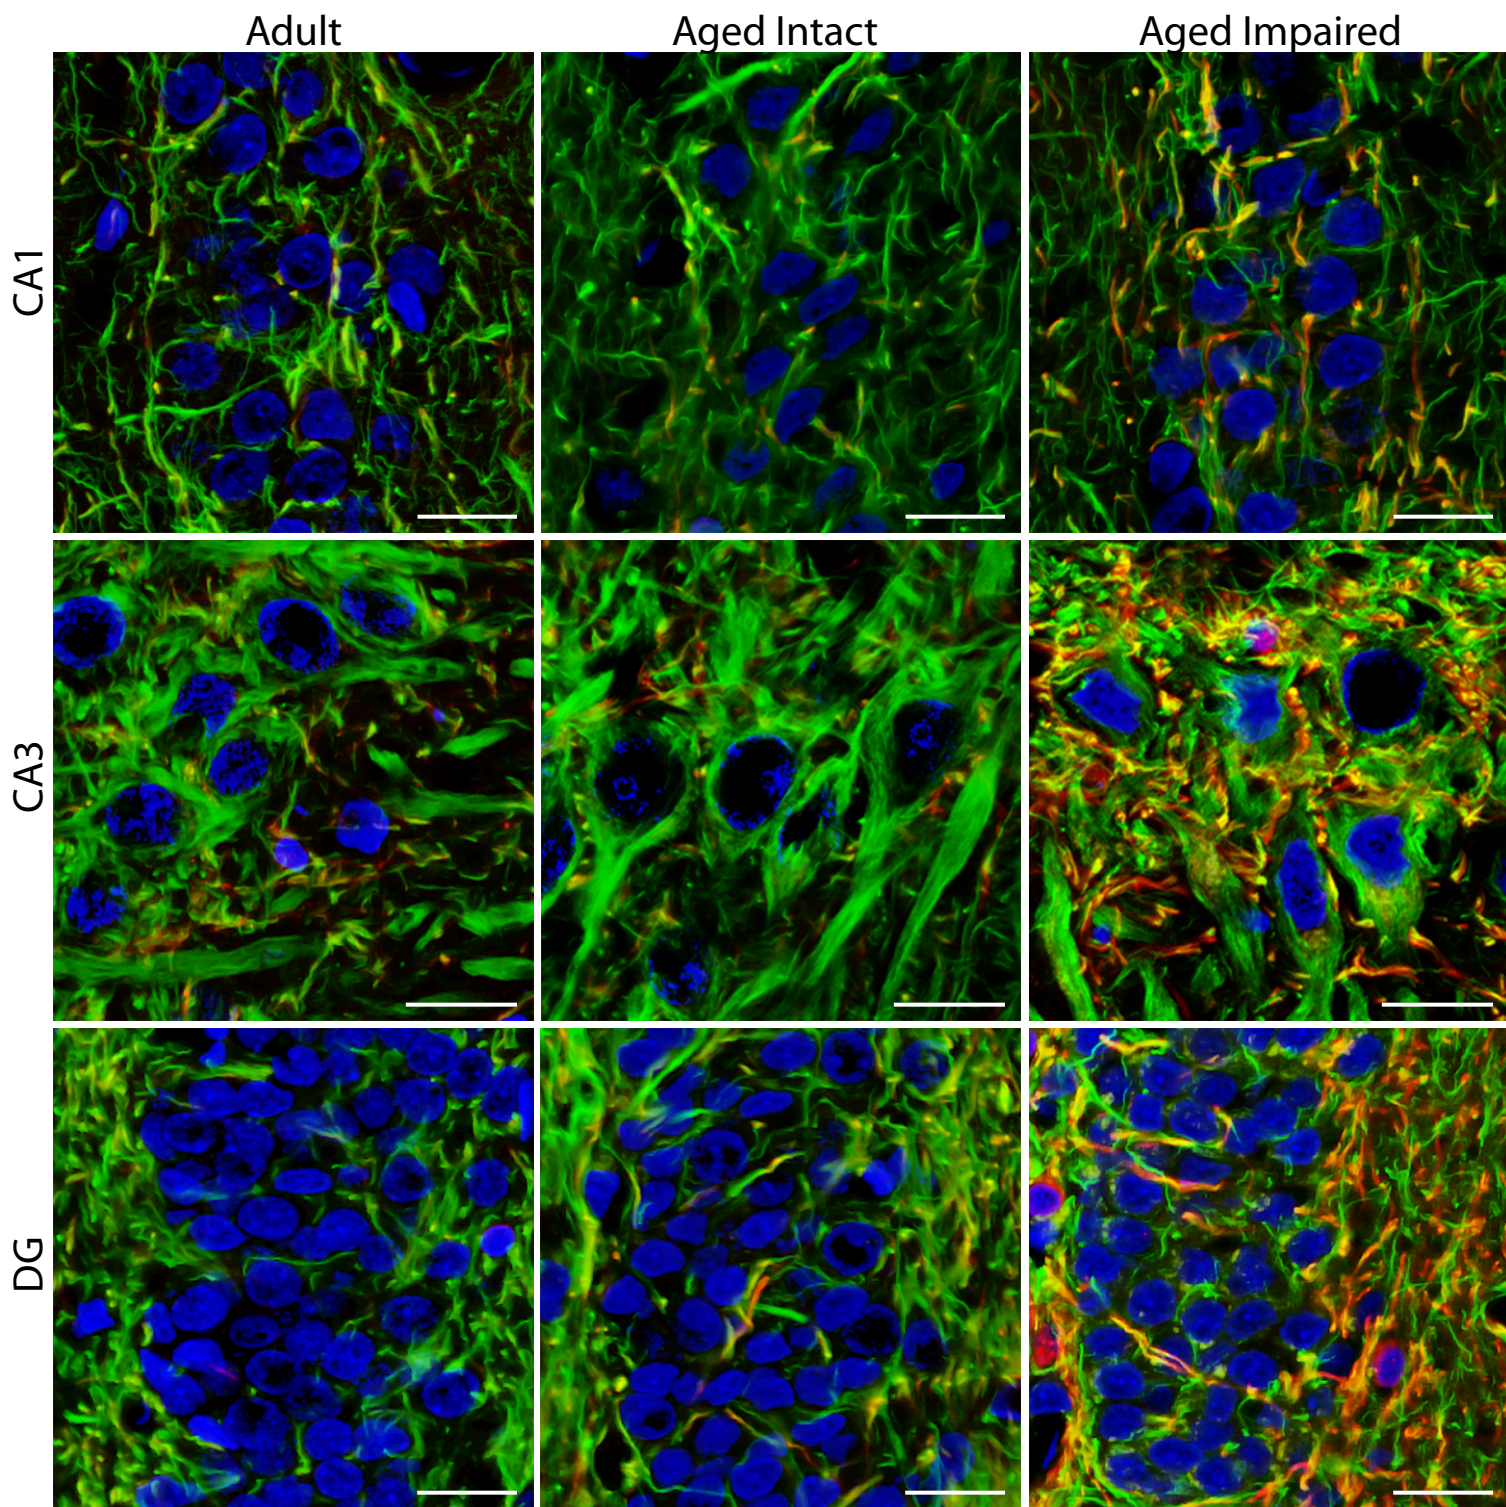

Supplement: NIHMS370786-supplement-Sup_Fig_1.pdf [file NIHMS370786-supplement-Sup_Fig_1.pdf]

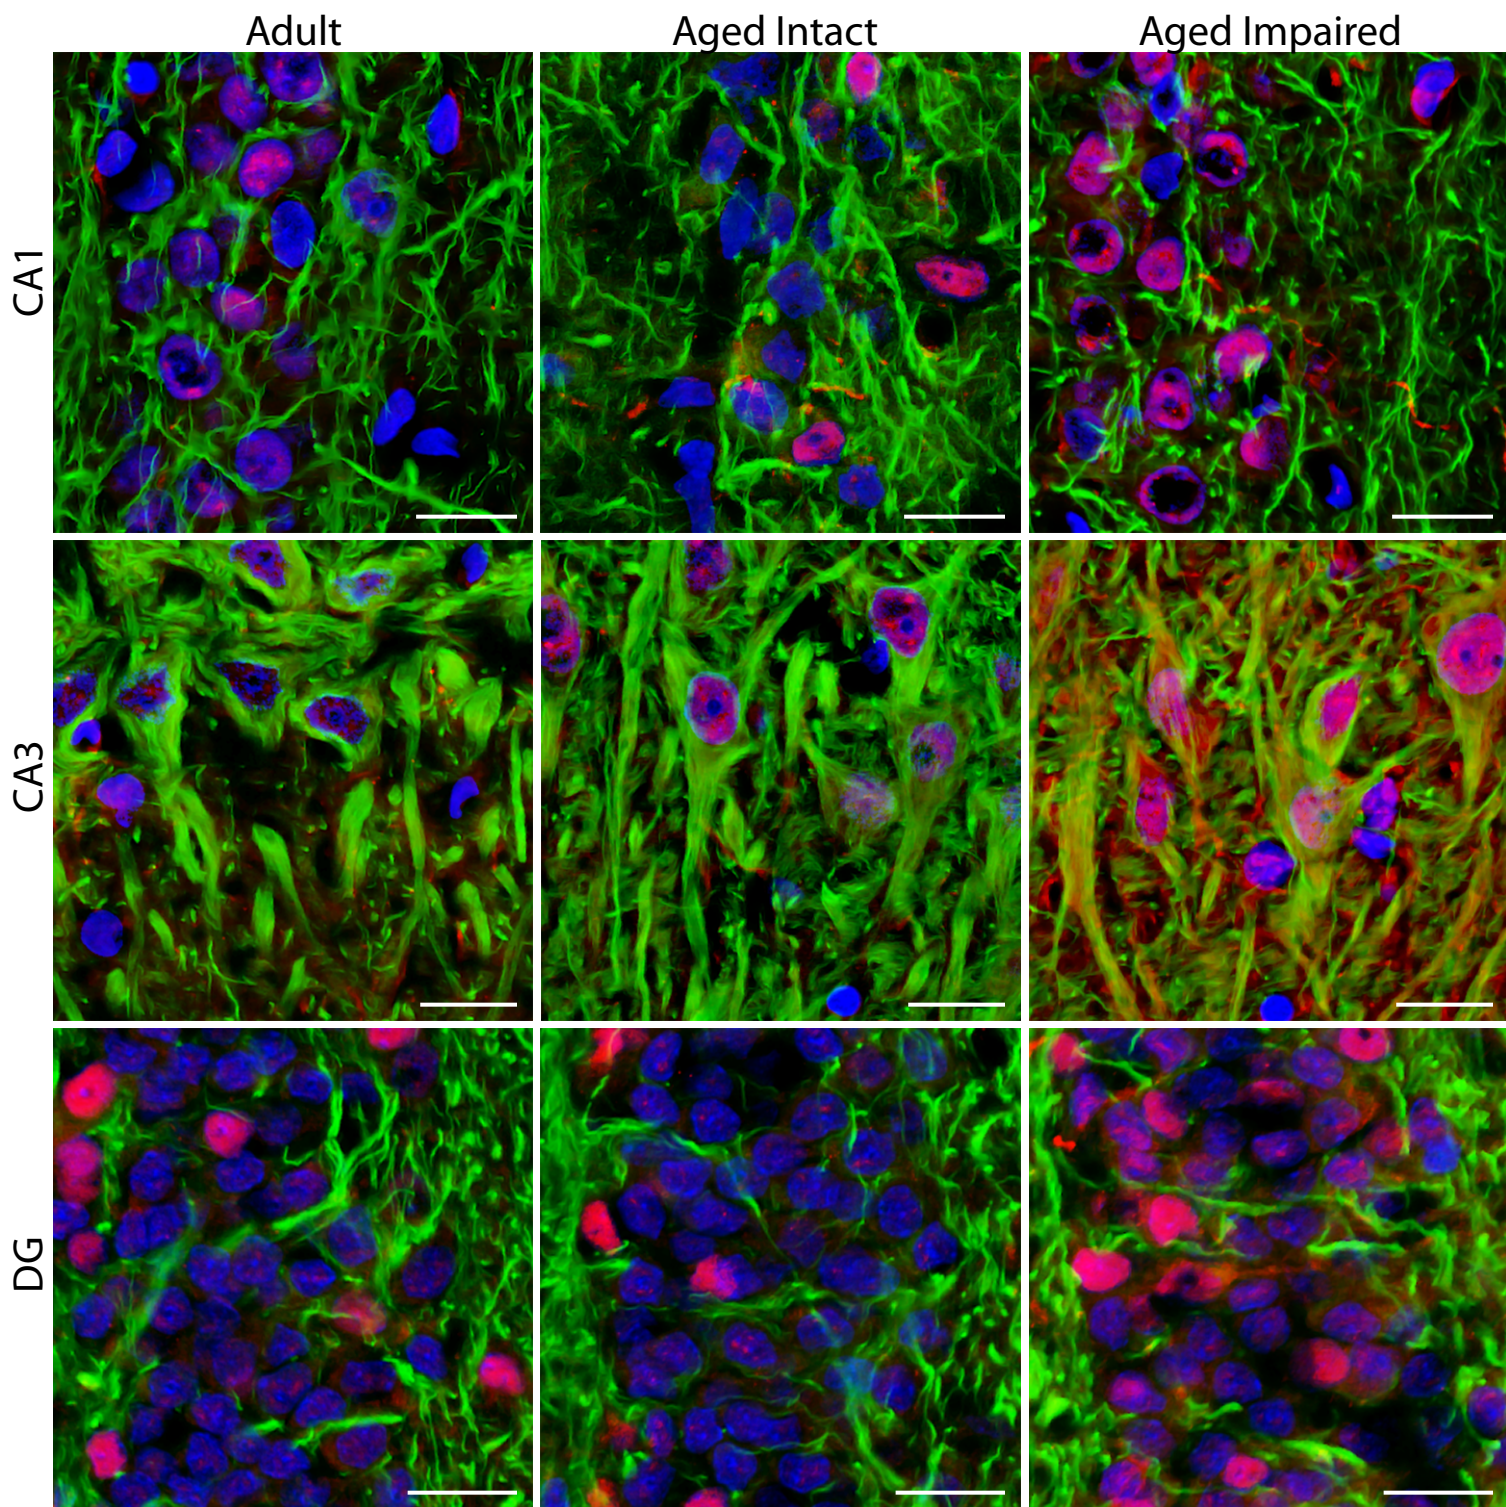

Supplement: NIHMS370786-supplement-Sup_Fig_2.pdf [file NIHMS370786-supplement-Sup_Fig_2.pdf]

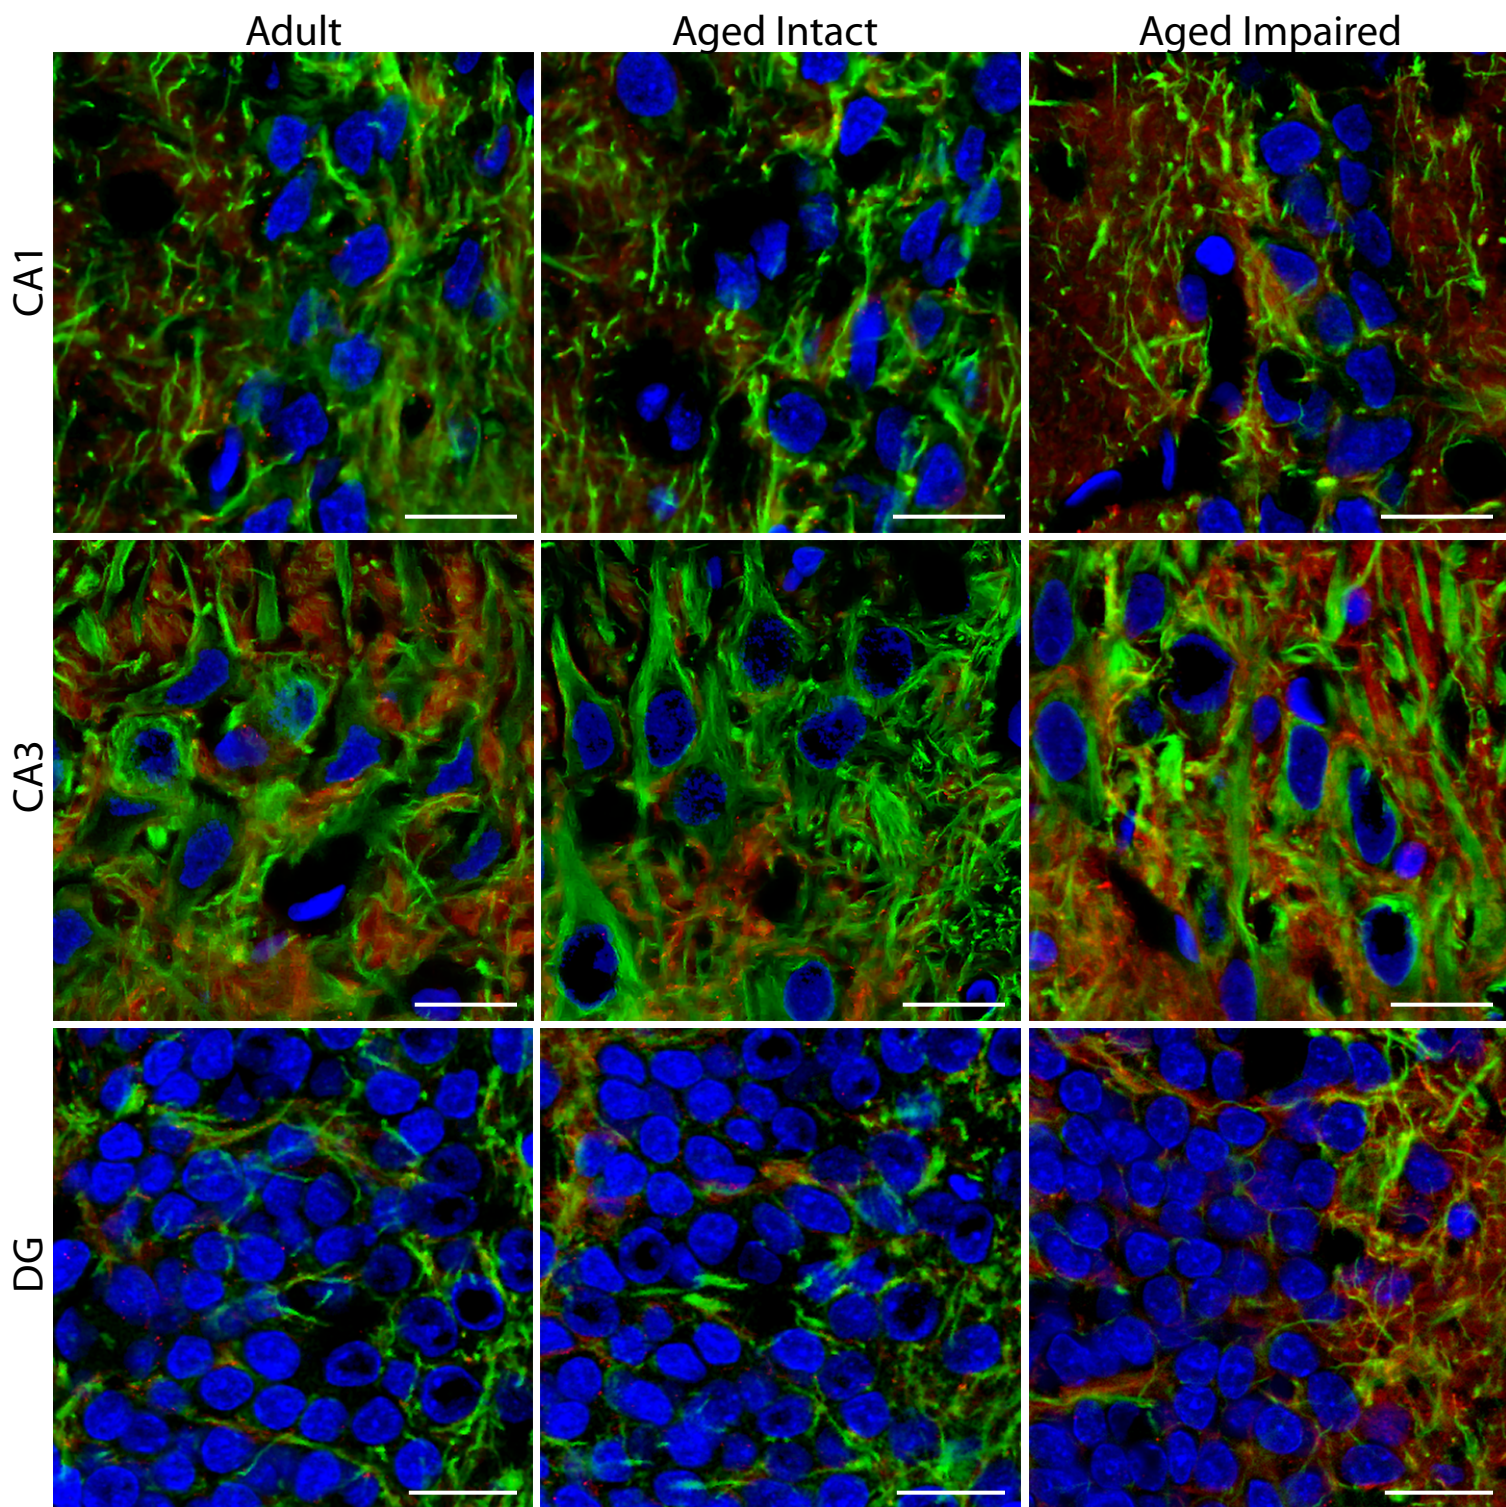

Supplement: NIHMS370786-supplement-Sup_Fig_3.pdf [file NIHMS370786-supplement-Sup_Fig_3.pdf]

Adult

Aged Intact

Aged Impaired

CA1

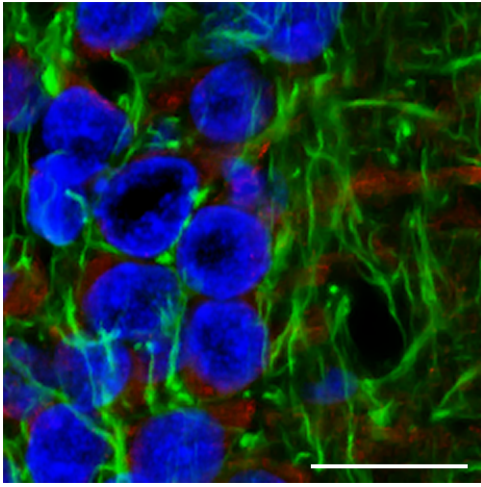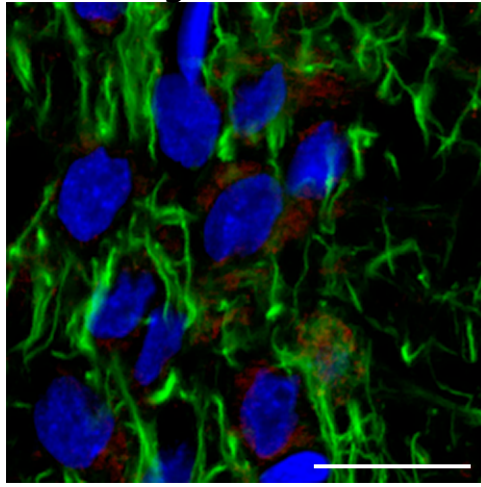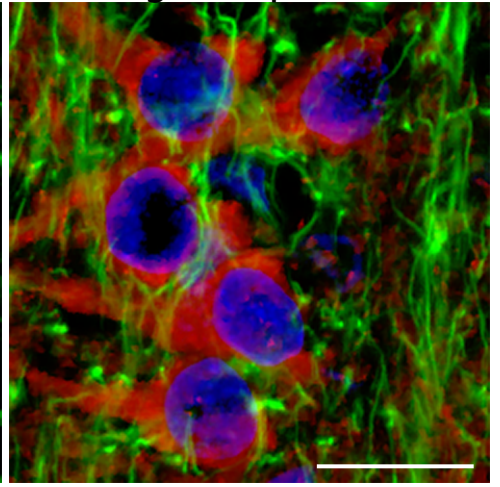

CA3

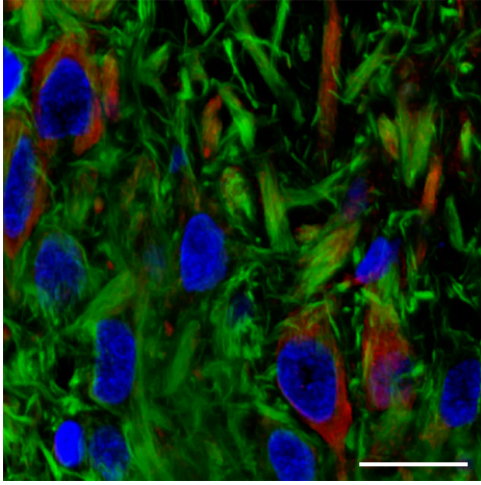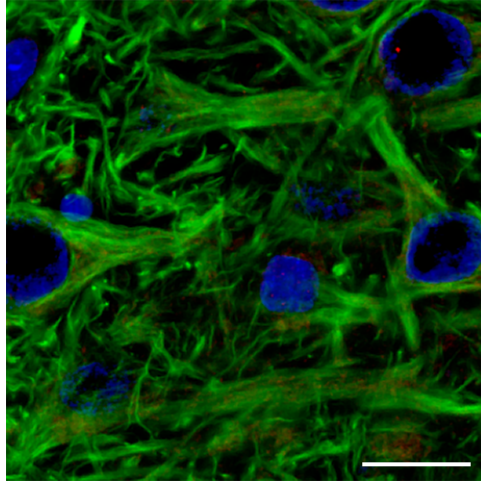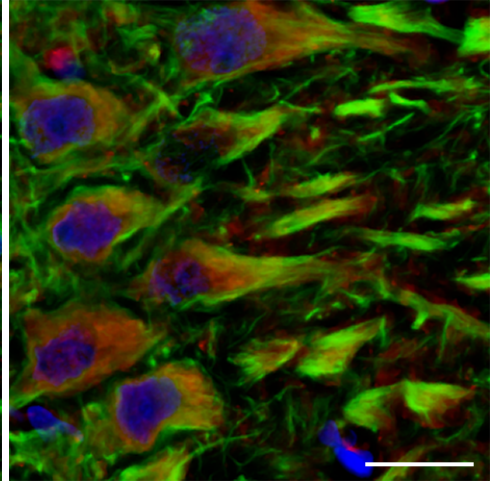

DG

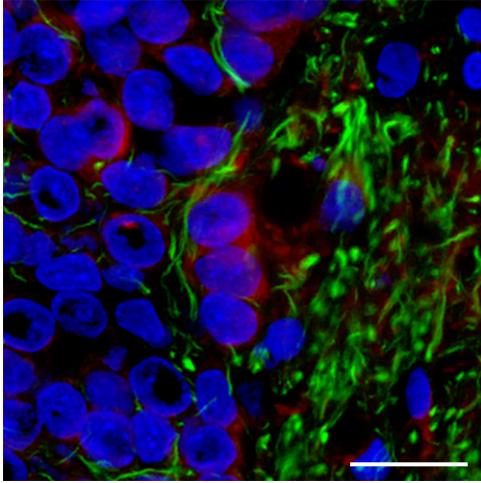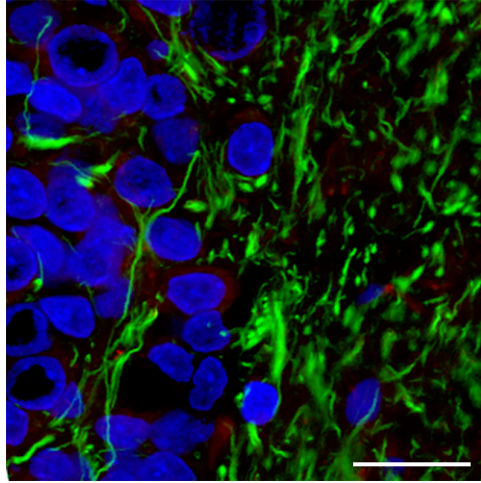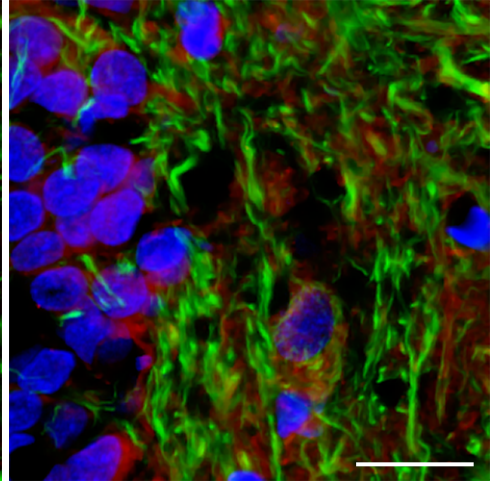

Supplement: NIHMS370786-supplement-Sup_Fig_4.pdf [file NIHMS370786-supplement-Sup_Fig_4.pdf]

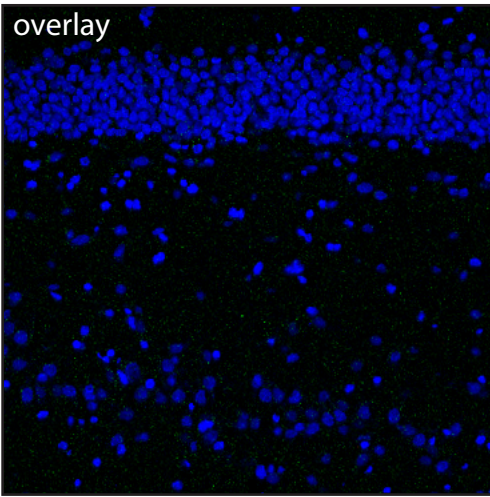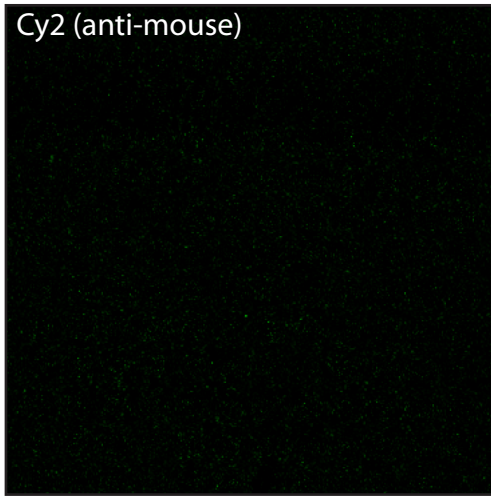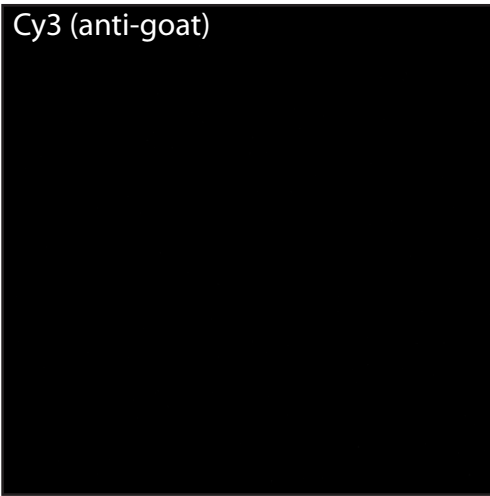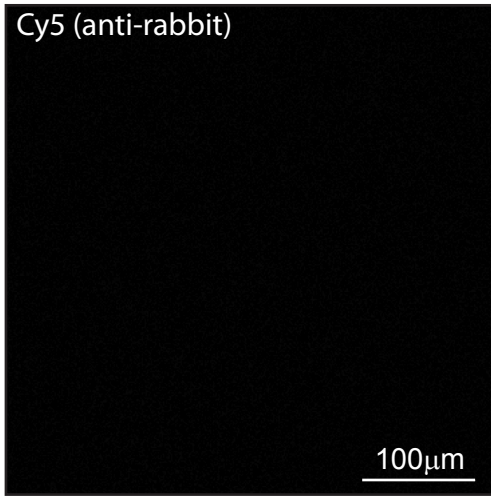

100μm

Supplement: NIHMS370786-supplement-Sup_Fig_5.pdf [file NIHMS370786-supplement-Sup_Fig_5.pdf]
